# Supplementary material
Source: PubMed Central journal article supplement (PMC2397486)
Supplement: M710269200_1.pdf [file M710269200_1.pdf]

**SUPPLEMENTAL DATA****SUPPLEMENTAL FIGURE LEGENDS**

Figure **S1**. *Detection  $\alpha_1$  sGC splice forms in BE2 cells by RT-PCR.* **Lane 1** - Primers PR1 and PR2 (Fig. 1A), specific for N1- $\alpha_1$  sGC splice mRNA, amplify a 1100 bp fragment containing the coding sequence for N1- $\alpha_1$  sGC splice form. **Lane 2** - PR3 and PR4 primers, specific for sequences surrounding the start and stop codons of  $\alpha_1$  sGC mRNA, amplify a 427 bp fragment containing the coding sequence for N2-  $\alpha_1$  sGC (marked with arrow) and a 2 kb fragment containing the coding sequence of the full size  $\alpha_1$  sGC (top band). **Lane 3** - Primers PR5 and PR6, amplify a 380 bp fragment from the full size sGC transcript and a 217 bp fragment containing a deletion specific for C- $\alpha_1$  sGC splice mRNA (AK226125 accession number). **Lane 4** - Primers PR7 and PR8, amplify a 468 bp fragment from the full size sGC transcript and a 330 bp fragment containing a deletion specific for C\*- $\alpha_1$  transcript (BX649180 accession number), absent in BE2 cells. Molecular weight marker is a mixture of Lambda DNA-Hind III and  $\phi$ X174 DNA-Hae III digests (New England Biolabs, USA).

Figure **S2**. *Detection C- $\alpha_1$  sGC splice forms in normal human tissues by RT-PCR.* **A.** Primers PR5 and PR6 were used to detect amplicons specific for the  $\alpha_1$  and C- $\alpha_1$  transcripts in the following human tissues: 1, Esophagus; 2, Heart; 3, Kidney; 4, Liver; 5, Lung; 6, Adipose; 7, Bladder; 8, Brain; 9, Cervix; 10, Colon; 11, Testes; 12, Spleen; 13, Thyroid; 14, Thymus; 15, Trachea; 16, Ovary; 17, Placenta; 18, Prostate; 19, Small intestine; 20, Skeletal Muscle. **B.** The bands indicated by arrows obtained from the tissues 1, 2, 14 and 18 were excised from the gel and sequenced to confirm the identity of the amplicons.

Figure **S3**. *Detection C\*- $\alpha_1$  sGC splice forms in normal human tissues by RT-PCR.* **A.** Primers PR7 and PR8 were used to detect amplicons specific for the  $\alpha_1$  and C\*- $\alpha_1$  transcripts in the following human tissues: 1, Esophagus; 2, Heart; 3, Kidney; 4, Liver; 5, Lung; 6, Adipose; 7, Bladder; 8, Brain; 9, Cervix; 10, Colon; 11, Testes; 12, Spleen; 13, Thyroid; 14, Thymus; 15, Trachea; 16, Ovary; 17, Placenta; 18, Prostate; 19, Small intestine; 20, Skeletal Muscle. **B.** The bands indicated by arrows obtained from the tissues 4, 5, 6, 12, 15, 18 were excised from the gel and sequenced to confirm the identity of the amplicons.

Figure **S4**. *Co-expression of N1- $\alpha_1$  sGC inhibits  $\alpha_1/\beta_1$  sGC activity in Sf9 cells.* Rate of cGMP production in response to DEA-NO (200  $\mu$ M), BAY 41-2272 (2  $\mu$ M) or both treatments in lysates of Sf9 cell expressing  $\alpha_1/\beta_1$  sGC and different amounts of N1- $\alpha_1$  protein. Data from three independent experiments are presented as mean  $\pm$  SD.

Figure **S5**. *Ni-agarose pull-down of  $\alpha_1/\beta_1$  and N1- $\alpha_1/\beta_1$  proteins from the Sf9 lysate.* Sf9 lysates expressing  $\alpha_1$  and 6His-tagged  $\beta_1$  subunits or flagged N1- $\alpha_1$  and 6His-tagged  $\beta_1$  were loaded on 1 ml HisTrap column (GE Healthscience), washed with 10 mM and eluted with 150 mM imidazole.

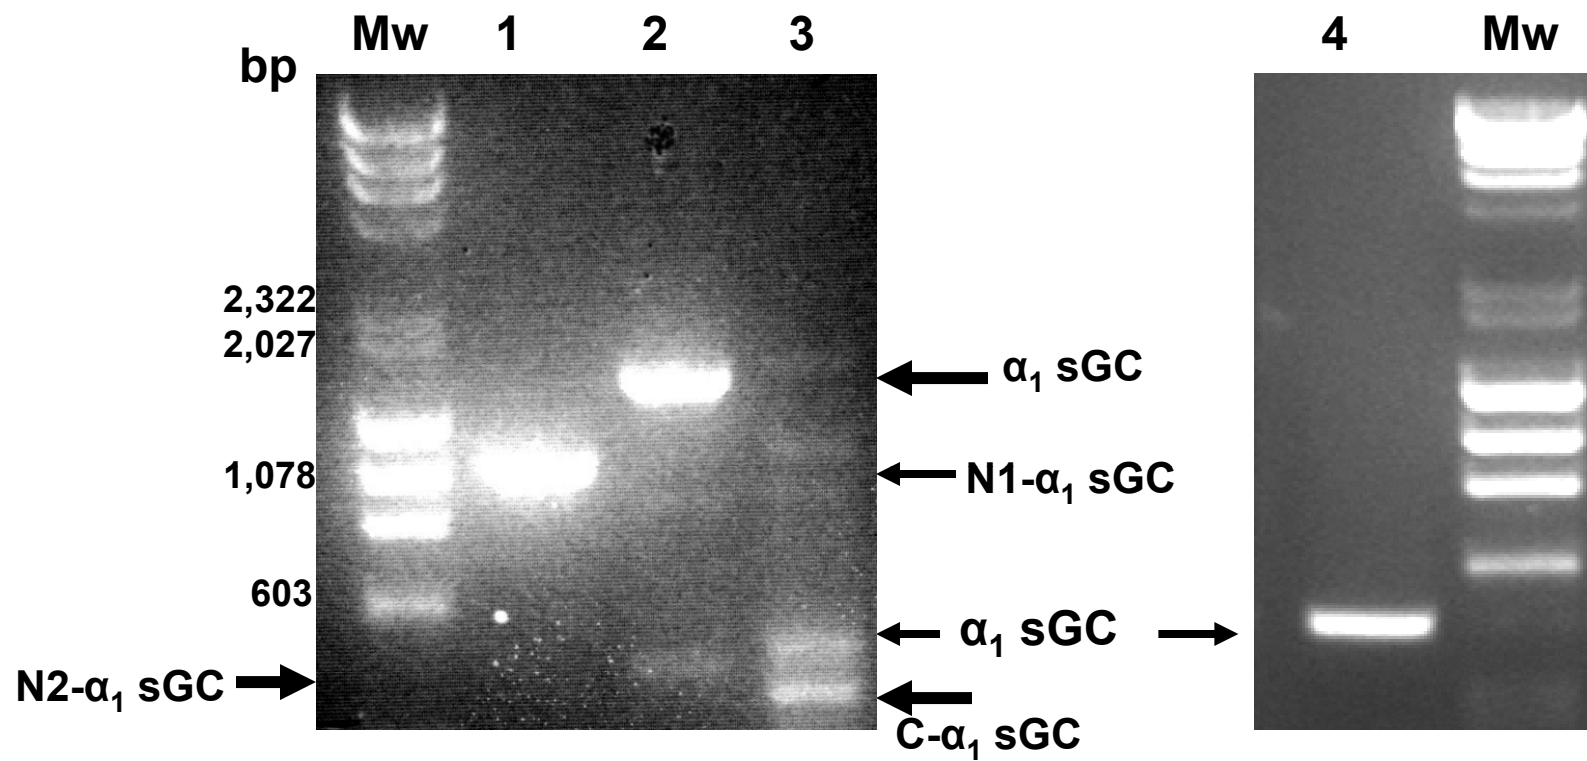

**Fig. S1**

**A**

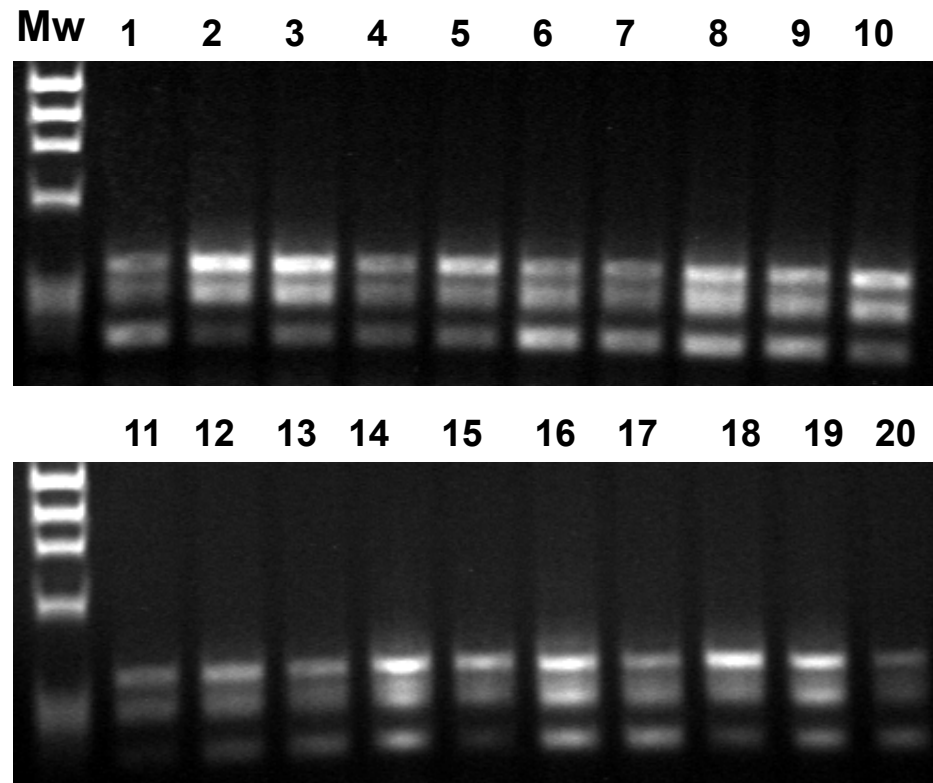

**B**

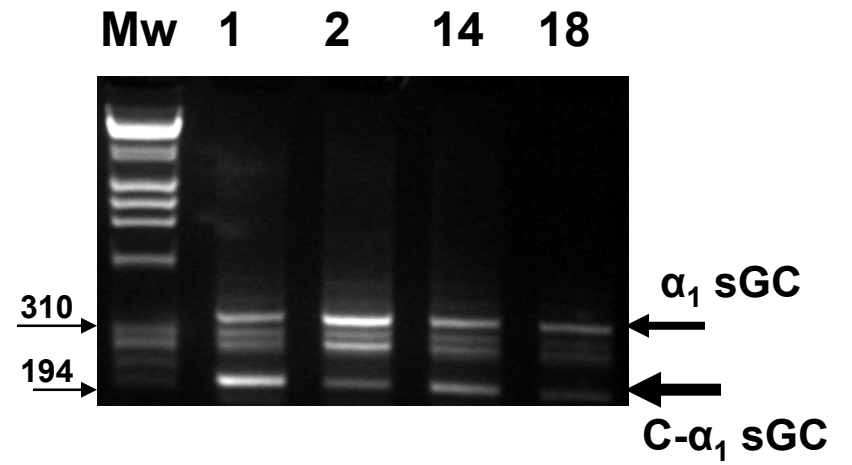

**Fig. S2**

**A**

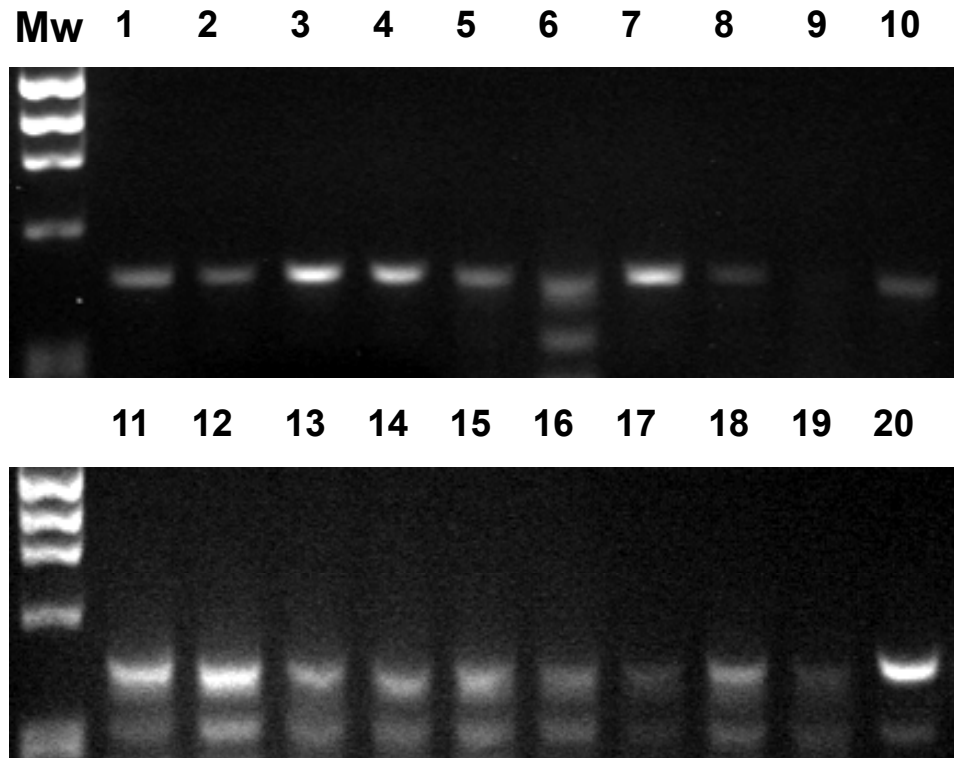

**B**

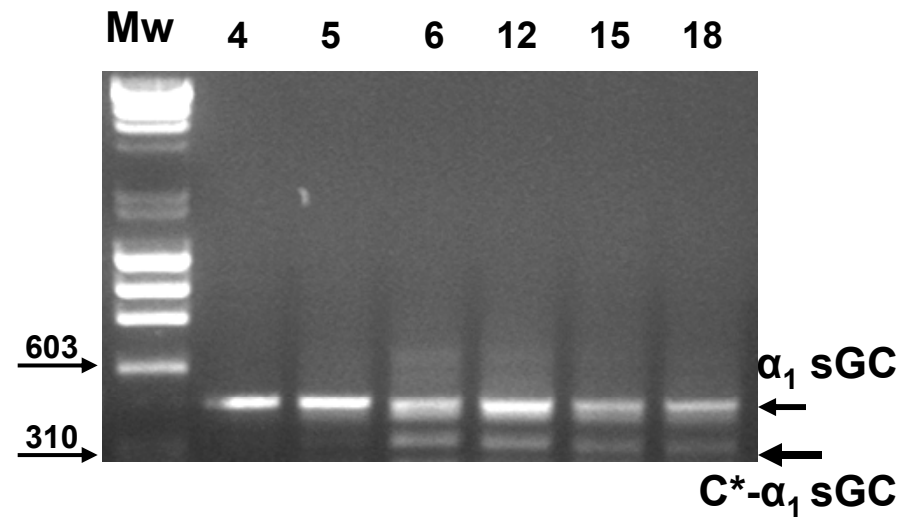

**Fig. S3**

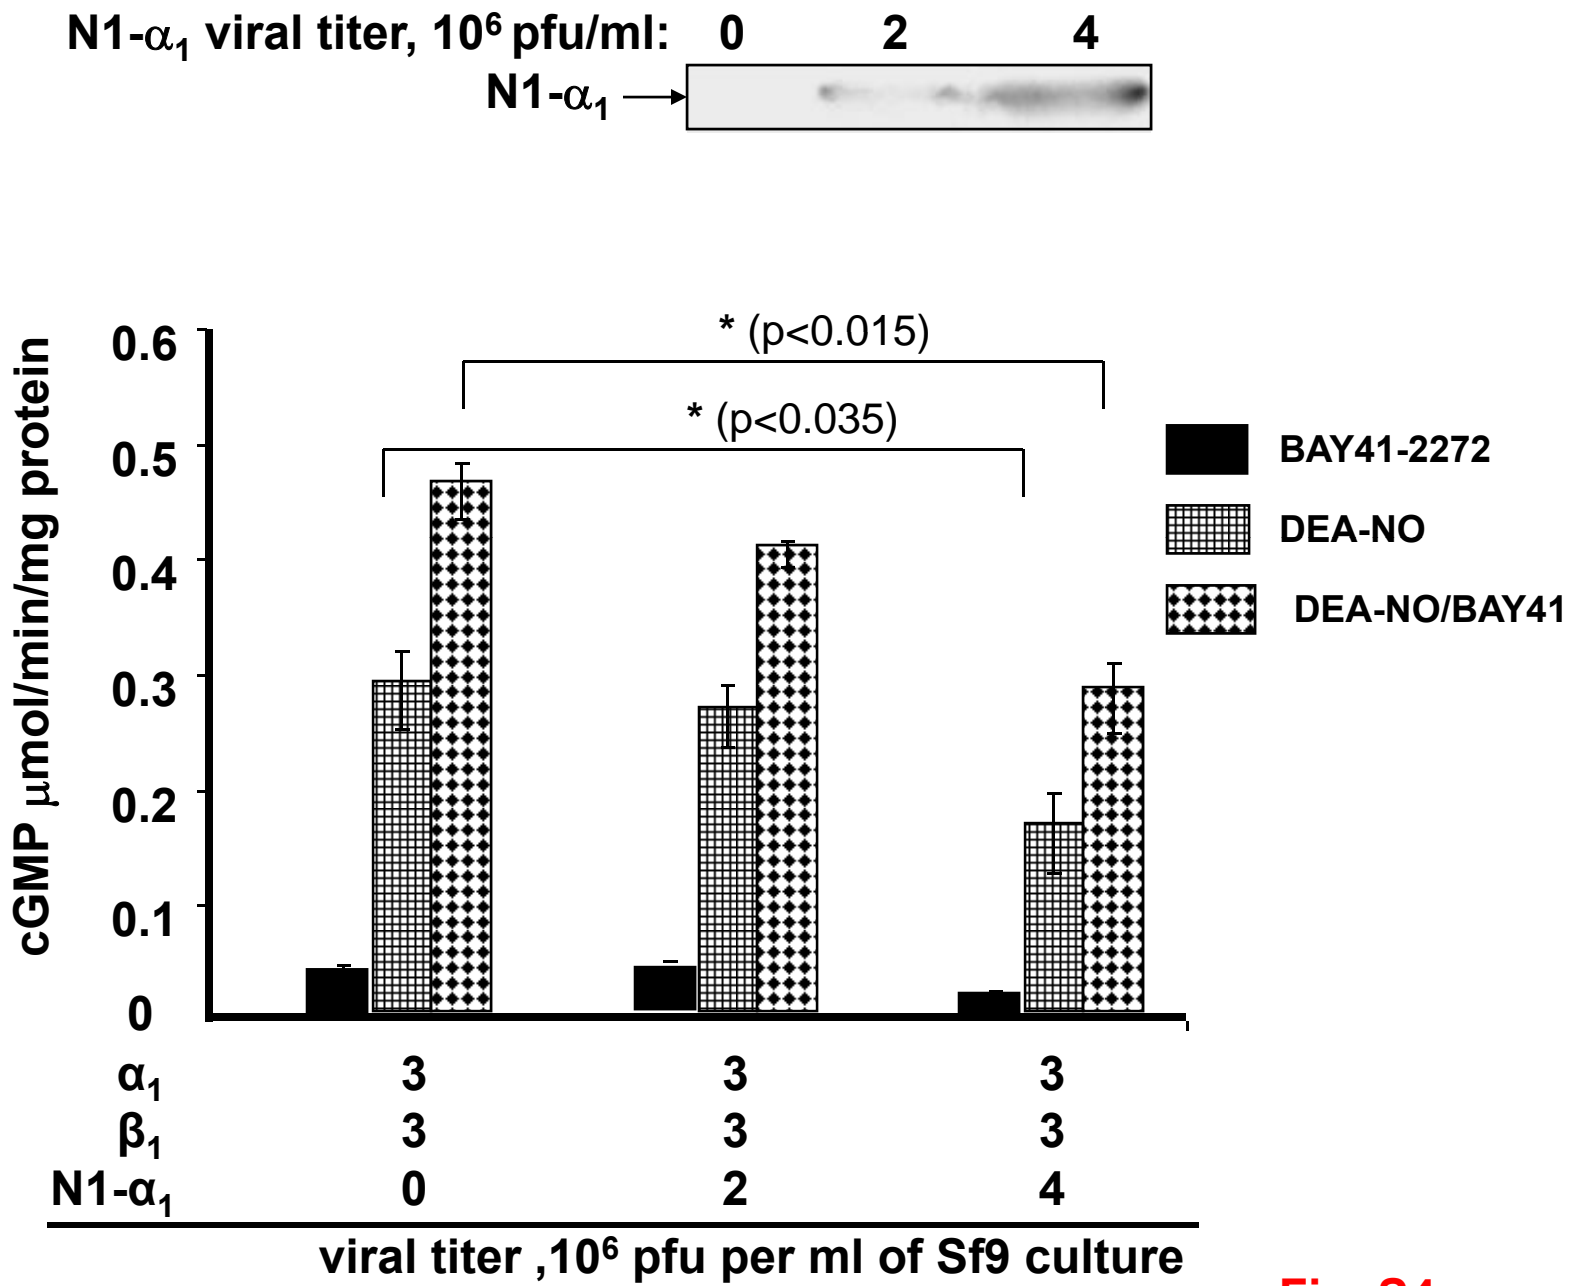

Fig. S4

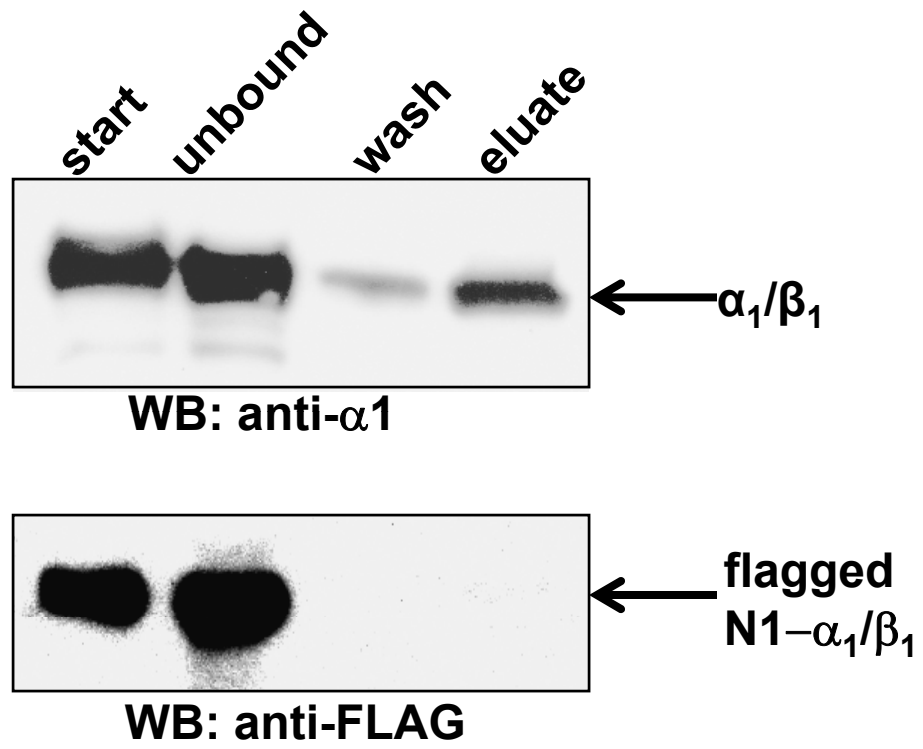

**Fig. S5**

**Table S1. Diversity of human  $\alpha_1$  sGC mRNAs in NCBI database**

| <b>Accession N</b> | <b>Predicted size of the transcript</b> | <b>Human tissue source</b> | <b>Encodes</b>                            |
|--------------------|-----------------------------------------|----------------------------|-------------------------------------------|
| BX647200           | 4.4 kb                                  | salivary gland             | full size protein                         |
| AK096588           | 2.6 kb                                  | brain                      | full size protein                         |
| U58855             | 2.6 kb                                  | kidney                     | full size protein                         |
| Y15723             | 3.1 kb                                  | brain                      | full size protein                         |
| BC028384           | 2.7 kb                                  | brain, hypothalamus        | full size protein                         |
| X66534             | 3.0 kb                                  | brain, frontal lobe        | full size protein                         |
| BC095395           | 2.6 kb                                  | brain, hippocampus         | full size protein                         |
| BC012627           | 1.2 kb                                  | prostate                   | 330 aa C-term. deletion (N1- $\alpha_1$ ) |
| CR618242           | 1.5 kb                                  | neuroblastoma              | 564 aa C-term. deletion (N2- $\alpha_1$ ) |
| CR614534           | 1.5 kb                                  | placenta                   | 564 aa C-term. deletion (N2- $\alpha_1$ ) |
| BX649180           | 4.3 kb                                  | small intestine            | 240 aa N-term. deletion (C*- $\alpha_1$ ) |
| AK226125           | 4.3 kb                                  | brain                      | 240 aa N-term. deletion (C- $\alpha_1$ )  |

**Table S2. Sequence variations in  $\alpha_1$  sGC splice forms.**

**A.** Alternative 3' end of exon 7 in N1- $\alpha_1$  sGC transcript. Additional sequence and amino acids are marked in bold. Numeration is according CR618242 sequence.

S S R V R K T \*

1400 tcttcaagg**gtaaggaaaacataatactatcttgaatatgaaagctat**ttcat

**Attaagagcaagaaacaaaagggtaaaaatatatgcatcacttcaa**Tggt

**tgataaaacatatgtaaaacaatggtaaaagaat** 1540

**B.** Alternative 5' end of intron 7 in N2- $\alpha_1$  sGC transcript. New peptide sequence and premature stop site are shown. Numeration is according BC012627 sequence.

G D H W R C L L C S W G I T Q R E \*

**576** ggagaccattggcgatgcctattgtgtagctgggggattacacaaagagagtga **630**



**Table S3. Q-PCR assays.**

|                                 | $\alpha_1$ sGC                           | N1- $\alpha_1$ sGC                     | N2- $\alpha_1$ sGC              |
|---------------------------------|------------------------------------------|----------------------------------------|---------------------------------|
| Accession number                | Y15723                                   | CR818242                               | BC012627                        |
| 5' Primer                       | 2043+ATGCACTGTAC<br>ACTCGCTTCG           | 1358+AGTTTGTGTA<br>CGAGTGAGG           | 539+TTGAAAAACAAT<br>TGCAGAGC    |
| 3' Primer                       | 2122-<br>ACAATAGGCATCGCC<br>AATGG        | 1434-<br>AAGATAGTATTATGT<br>TTTCCTTACC | 606-<br>GCTACACAATAGGCAT<br>CGC |
| Probe sequence                  | 2099-<br>CCACCTGTAGACAT<br>CCAGCTCTCCACA | 1405-<br>AAGATTTTTTCACAG<br>AGTTGTCCCA | 582-<br>CCACCTGCTGCAACTG        |
| Amplicon                        | 77 bases                                 | 79 bases                               | 72 bases                        |
| Lowest limit for quantification | 190 molecules                            | 180 molecules                          | 200 molecules                   |
| PCR efficiency                  | 97%                                      | 95%                                    | 93%                             |

**Table S4. Relative numbers of N1- and N2- $\alpha_1$  sGC transcripts by Q-PCR detection in normal human tissues (normalized to 36b4 levels).**

| <b>Tissue</b>   | <b>Full size <math>\alpha_1</math></b> | <b>N1-type</b> | <b>N2-type</b> |
|-----------------|----------------------------------------|----------------|----------------|
| Esophagus       | 70926.99                               | 62.0           | 688.0          |
| Heart           | 349145.8                               | 2350.4         | 2015.5         |
| Kidney          | 261295.6                               | 5604.5         | 3502.8         |
| Liver           | 58203.7                                | 774.4          | 612.3          |
| Lung            | 206587.0                               | 7219           | 1786.0         |
| Adipose         | 228441.1                               | 3235.7         | 2161.9         |
| Bladder         | 148411.6                               | 0              | 1775.9         |
| Brain           | 1125930.0                              | 4651.9         | 9875.5         |
| Cervix          | 226653.4                               | 3186.2         | 2203.1         |
| Colon           | 211391.3                               | 771.8          | 2199.0         |
| Testes          | 42990.1                                | 0              | 205.0          |
| Spleen          | 158613.1                               | 2763.0         | 1943.5         |
| Thyroid         | 69515.2                                | 0              | 889.8          |
| Thymus          | 138170.2                               | 2600.5         | 1206.0         |
| Trachea         | 71643.6                                | 1413.7         | 885.1          |
| Ovary           | 539106.4                               | 8871.9         | 7304.3         |
| Placenta        | 212767.3                               | 0              | 623.3          |
| Prostate        | 568469.1                               | 19679.4        | 4619.9         |
| Small intestine | 138709.6                               | 1162.5         | 1419.6         |
| Skeletal muscle | 26445.7                                | 0              | 399.1          |
